# Supplementary material for: Efficacy of transcranial direct-current stimulation (tDCS) in women with provoked vestibulodynia: study protocol for a randomized controlled trial
Source: Springer Nature journal article supplement (doi:10.1186/s13063-016-1366-5), 2016-05-14
Supplement: MOESM1 [file 10122822]

SPIRIT 2013 Checklist: Recommended items to address in a clinical trial protocol and related documents\*

| Section/item                                                   | ItemNo | Description                                                                                                                                                                                                                                                                                            |
|----------------------------------------------------------------|--------|--------------------------------------------------------------------------------------------------------------------------------------------------------------------------------------------------------------------------------------------------------------------------------------------------------|
| <b>Administrative information</b>                              |        |                                                                                                                                                                                                                                                                                                        |
| <input checked="" type="checkbox"/> Title                      | 1      | Descriptive title identifying the study design, population, interventions, and, if applicable, trial acronym                                                                                                                                                                                           |
| <input checked="" type="checkbox"/> Trial registration         | 2a     | Trial identifier and registry name. If not yet registered, name of intended registry                                                                                                                                                                                                                   |
|                                                                | 2b     | All items from the World Health Organization Trial Registration Data Set                                                                                                                                                                                                                               |
| <input checked="" type="checkbox"/> Protocol version           | 3      | Date and version identifier                                                                                                                                                                                                                                                                            |
| <input checked="" type="checkbox"/> Funding                    | 4      | Sources and types of financial, material, and other support                                                                                                                                                                                                                                            |
| <input checked="" type="checkbox"/> Roles and responsibilities | 5a     | Names, affiliations, and roles of protocol contributors                                                                                                                                                                                                                                                |
|                                                                | 5b     | Name and contact information for the trial sponsor                                                                                                                                                                                                                                                     |
|                                                                | 5c     | Role of study sponsor and funders, if any, in study design; collection, management, analysis, and interpretation of data; writing of the report; and the decision to submit the report for publication, including whether they will have ultimate authority over any of these activities               |
|                                                                | 5d     | Composition, roles, and responsibilities of the coordinating centre, steering committee, endpoint adjudication committee, data management team, and other individuals or groups overseeing the trial, if applicable (see Item 21a for data monitoring committee) – <b>Not applicable to our study.</b> |
| <b>Introduction</b>                                            |        |                                                                                                                                                                                                                                                                                                        |
| <input checked="" type="checkbox"/> Background and rationale   | 6a     | Description of research question and justification for undertaking the trial, including summary of relevant studies (published and unpublished) examining benefits and harms for each intervention                                                                                                     |
|                                                                | 6b     | Explanation for choice of comparators                                                                                                                                                                                                                                                                  |
| <input checked="" type="checkbox"/> Objectives                 | 7      | Specific objectives or hypotheses                                                                                                                                                                                                                                                                      |
| <input checked="" type="checkbox"/> Trial design               | 8      | Description of trial design including type of trial (eg, parallel group, crossover, factorial, single group), allocation ratio, and framework (eg, superiority, equivalence, noninferiority, exploratory)                                                                                              |



|                                                        |     |                                                                                                                                                                                                                                                                                                                                                          |
|--------------------------------------------------------|-----|----------------------------------------------------------------------------------------------------------------------------------------------------------------------------------------------------------------------------------------------------------------------------------------------------------------------------------------------------------|
| Sequence generation                                    | 16a | Method of generating the allocation sequence (eg, computer-generated random numbers), and list of any factors for stratification. To reduce predictability of a random sequence, details of any planned restriction (eg, blocking) should be provided in a separate document that is unavailable to those who enrol participants or assign interventions |
| Allocation concealment mechanism                       | 16b | Mechanism of implementing the allocation sequence (eg, central telephone; sequentially numbered, opaque, sealed envelopes), describing any steps to conceal the sequence until interventions are assigned                                                                                                                                                |
| Implementation                                         | 16c | Who will generate the allocation sequence, who will enrol participants, and who will assign participants to interventions                                                                                                                                                                                                                                |
| <input checked="" type="checkbox"/> Blinding (masking) | 17a | Who will be blinded after assignment to interventions (eg, trial participants, care providers, outcome assessors, data analysts), and how                                                                                                                                                                                                                |
|                                                        | 17b | If blinded, circumstances under which unblinding is permissible, and procedure for revealing a participant's allocated intervention during the trial                                                                                                                                                                                                     |

**Methods: Data collection, management, and analysis**

|                                                             |     |                                                                                                                                                                                                                                                                                                                                                                                                              |
|-------------------------------------------------------------|-----|--------------------------------------------------------------------------------------------------------------------------------------------------------------------------------------------------------------------------------------------------------------------------------------------------------------------------------------------------------------------------------------------------------------|
| <input checked="" type="checkbox"/> Data collection methods | 18a | Plans for assessment and collection of outcome, baseline, and other trial data, including any related processes to promote data quality (eg, duplicate measurements, training of assessors) and a description of study instruments (eg, questionnaires, laboratory tests) along with their reliability and validity, if known. Reference to where data collection forms can be found, if not in the protocol |
|                                                             | 18b | Plans to promote participant retention and complete follow-up, including list of any outcome data to be collected for participants who discontinue or deviate from intervention protocols                                                                                                                                                                                                                    |
| <input checked="" type="checkbox"/> Data management         | 19  | Plans for data entry, coding, security, and storage, including any related processes to promote data quality (eg, double data entry; range checks for data values). Reference to where details of data management procedures can be found, if not in the protocol                                                                                                                                            |
| <input checked="" type="checkbox"/> Statistical methods     | 20a | Statistical methods for analysing primary and secondary outcomes. Reference to where other details of the statistical analysis plan can be found, if not in the protocol                                                                                                                                                                                                                                     |
|                                                             | 20b | Methods for any additional analyses (eg, subgroup and adjusted analyses)                                                                                                                                                                                                                                                                                                                                     |
|                                                             | 20c | Definition of analysis population relating to protocol non-adherence (eg, as randomised analysis), and any statistical methods to handle missing data (eg, multiple imputation)                                                                                                                                                                                                                              |

## Methods: Monitoring

- |                                     |                 |     |                                                                                                                                                                                                                                                                                                                                                                                                                                                                                                                                                                                                                                                 |
|-------------------------------------|-----------------|-----|-------------------------------------------------------------------------------------------------------------------------------------------------------------------------------------------------------------------------------------------------------------------------------------------------------------------------------------------------------------------------------------------------------------------------------------------------------------------------------------------------------------------------------------------------------------------------------------------------------------------------------------------------|
| <input checked="" type="checkbox"/> | Data monitoring | 21a | Composition of data monitoring committee (DMC); summary of its role and reporting structure; statement of whether it is independent from the sponsor and competing interests; and reference to where further details about its charter can be found, if not in the protocol.<br>Alternatively, an explanation of why a DMC is not needed – <b>Not applicable to our study. As indicated in our manuscript, adverse events will be monitored by the treatment provider. To comply with standard operating protocol (SOP #17) in force at our institution, each serious adverse event will be reported the Research Ethics Board of the CHUS.</b> |
|                                     |                 | 21b | Description of any interim analyses and stopping guidelines, including who will have access to these interim results and make the final decision to terminate the trial                                                                                                                                                                                                                                                                                                                                                                                                                                                                         |
| <input checked="" type="checkbox"/> | Harms           | 22  | Plans for collecting, assessing, reporting, and managing solicited and spontaneously reported adverse events and other unintended effects of trial interventions or trial conduct                                                                                                                                                                                                                                                                                                                                                                                                                                                               |
| <input checked="" type="checkbox"/> | Auditing        | 23  | Frequency and procedures for auditing trial conduct, if any, and whether the process will be independent from investigators and the sponsor – <b>According to standard operating protocol (SOP # 29) in force in our institution, research projects' random inspections are planned by our institutional REB.</b>                                                                                                                                                                                                                                                                                                                               |

## Ethics and dissemination

- |                                     |                          |     |                                                                                                                                                                                                                                                                                                                                                                                            |
|-------------------------------------|--------------------------|-----|--------------------------------------------------------------------------------------------------------------------------------------------------------------------------------------------------------------------------------------------------------------------------------------------------------------------------------------------------------------------------------------------|
| <input checked="" type="checkbox"/> | Research ethics approval | 24  | Plans for seeking research ethics committee/institutional review board (REC/IRB) approval                                                                                                                                                                                                                                                                                                  |
| <input checked="" type="checkbox"/> | Protocol amendments      | 25  | Plans for communicating important protocol modifications (eg, changes to eligibility criteria, outcomes, analyses) to relevant parties (eg, investigators, REC/IRBs, trial participants, trial registries, journals, regulators)                                                                                                                                                           |
| <input checked="" type="checkbox"/> | Consent or assent        | 26a | Who will obtain informed consent or assent from potential trial participants or authorised surrogates, and how (see Item 32)                                                                                                                                                                                                                                                               |
|                                     |                          | 26b | Additional consent provisions for collection and use of participant data and biological specimens in ancillary studies, if applicable                                                                                                                                                                                                                                                      |
| <input checked="" type="checkbox"/> | Confidentiality          | 27  | How personal information about potential and enrolled participants will be collected, shared, and maintained in order to protect confidentiality before, during, and after the trial – <b>According to standard operating protocol (SOP # 32) in force in our institution, all participants are identify by an alpha-numeric code in order to avoid research subjects' identification.</b> |

|                                                                   |     |                                                                                                                                                                                                                                                                                     |
|-------------------------------------------------------------------|-----|-------------------------------------------------------------------------------------------------------------------------------------------------------------------------------------------------------------------------------------------------------------------------------------|
| <input checked="" type="checkbox"/> Declaration of interests      | 28  | Financial and other competing interests for principal investigators for the overall trial and each study site                                                                                                                                                                       |
| <input checked="" type="checkbox"/> Access to data                | 29  | Statement of who will have access to the final trial dataset, and disclosure of contractual agreements that limit such access for investigators                                                                                                                                     |
| <input checked="" type="checkbox"/> Ancillary and post-trial care | 30  | Provisions, if any, for ancillary and post-trial care, and for compensation to those who suffer harm from trial participation                                                                                                                                                       |
| <input checked="" type="checkbox"/> Dissemination policy          | 31a | Plans for investigators and sponsor to communicate trial results to participants, healthcare professionals, the public, and other relevant groups (eg, via publication, reporting in results databases, or other data sharing arrangements), including any publication restrictions |
|                                                                   | 31b | Authorship eligibility guidelines and any intended use of professional writers                                                                                                                                                                                                      |
|                                                                   | 31c | Plans, if any, for granting public access to the full protocol, participant-level dataset, and statistical code                                                                                                                                                                     |
| <b>Appendices</b>                                                 |     |                                                                                                                                                                                                                                                                                     |
| <input checked="" type="checkbox"/> Informed consent materials    | 32  | Model consent form and other related documentation given to participants and authorised surrogates – <b>A French version of the ICF can be provided if needed.</b>                                                                                                                  |
| <input checked="" type="checkbox"/> Biological specimens          | 33  | Plans for collection, laboratory evaluation, and storage of biological specimens for genetic or molecular analysis in the current trial and for future use in ancillary studies, if applicable – <b>Not applicable for our study.</b>                                               |

---

\*It is strongly recommended that this checklist be read in conjunction with the SPIRIT 2013 Explanation & Elaboration for important clarification on the items. Amendments to the protocol should be tracked and dated. The SPIRIT checklist is copyrighted by the SPIRIT Group under the Creative Commons "[Attribution-NonCommercial-NoDerivs 3.0 Unported](https://creativecommons.org/licenses/by-nc-nd/3.0/)" license.
